# Supplementary material
Source: Springer Nature journal article supplement (https://mijn.bsl.nl/resource/supplementary/13047_2013_569_MOESM4_ESM.docx/7112424)
Supplement: MOESM4 [file 7112424]

| **Sensor and foot region** | **Friedman Peak pressure** | **Wilcoxon** | **Friedman Contact** | **Wilcoxon** | **Friedman time to peak** | **Wilcoxon** | **Friedman pressure time integral** | **Wilcoxon** |
| --- | --- | --- | --- | --- | --- | --- | --- | --- |
| 3 | 0.005 | 0.02 Rvs&P | 0.003 | 0.03 ALL | 0.6 | ----- | 0.001 | 0.01 RvS&P |
| 5 | 0.134 | ----- | 0.029 | 0.019 PvR | 0.004 | 0.015 RvP&S | 0.31 | ----- |
| Toe 1 | 0.000 | 0.000 BvR, SvP | 0.000 | 0.001 BvR&P | 0.006 | 0.005 BvR | 0.001 | 0.004 BvR, SvP |
| Toe 2-5 | 0.000 | 0.002 SvR&P, BvP&S | 0.003 | 0.003 BvR&P,SvP | 0.026 | 0.005 SvP, BvP | 0.002 | 0.006 PvS&B |

**Table 2.** Nonparametric data analysed using a Friedman Test, significance set at *p* >0.05 with Wilcoxon Rank to determine where significance lies. B=barefoot, R=round shoe,P=pointed shoe and S= square shoe condition.
